# Supplementary material for: Constructing oxygen vacancy-enriched Fe2O3@NiO heterojunctions for highly efficient electrocatalytic alkaline water splitting
Source: Royal Society of Chemistry journal article supplement (doi:10.1039/d1ce01309b), 2021-11-15
Supplement: d1ce01309b1.pdf [file d1ce01309b1.pdf]

Electronic Supplementary Material (ESI) for CrystEngComm.

This journal is © The Royal Society of Chemistry 2021

## Supporting information

### Constructing oxygen vacancy-enriched Fe<sub>2</sub>O<sub>3</sub>@NiO heterojunctions for highly efficient electrocatalytic alkaline water splitting

Yan Sang\*, Xi Cao, Gaofei Ding, Zixuan Guo, Yingying Xue, Guohong Li, Runhan

Yu

College of Chemistry and Materials Science, the Key Laboratory of Functional Molecular Solids, Ministry of Education, Anhui Laboratory of Molecular-Based Materials, The Key Laboratory of Electrochemical Clean Energy of Anhui Higher Education Institutes, Anhui Normal University, Wuhu, 241002, P. R. China

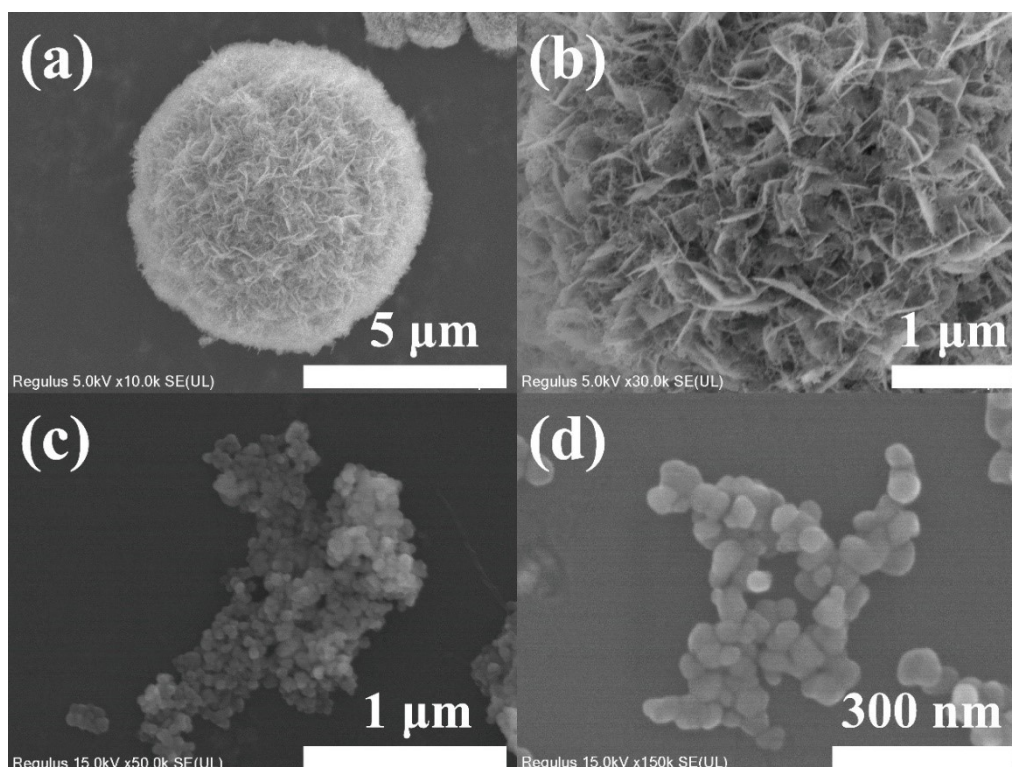

**Fig. S1.** (a, b) SEM images of pure NiO at low and high magnification. (c, d) SEM images of pure Fe<sub>2</sub>O<sub>3</sub> at low and high magnification.

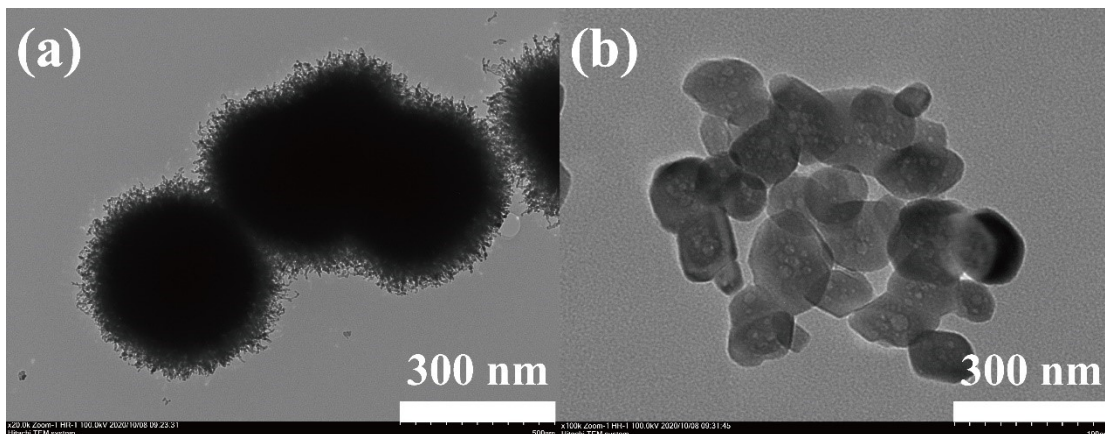

**Fig. S2.** (a) TEM image of pure NiO. (b) TEM image of pure Fe<sub>2</sub>O<sub>3</sub>.

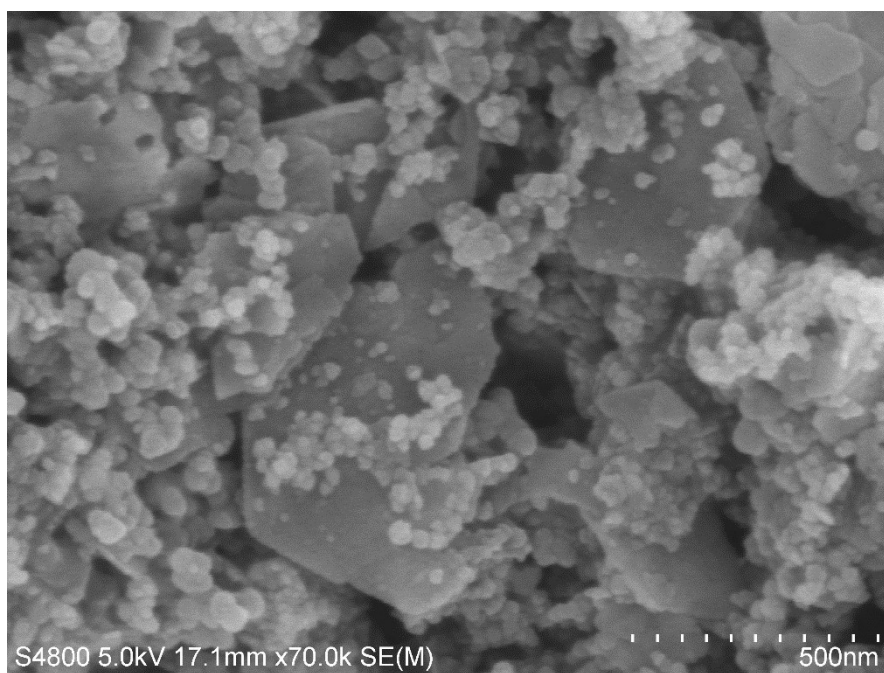

**Fig. S3.** SEM image after the electrochemical performance testing.

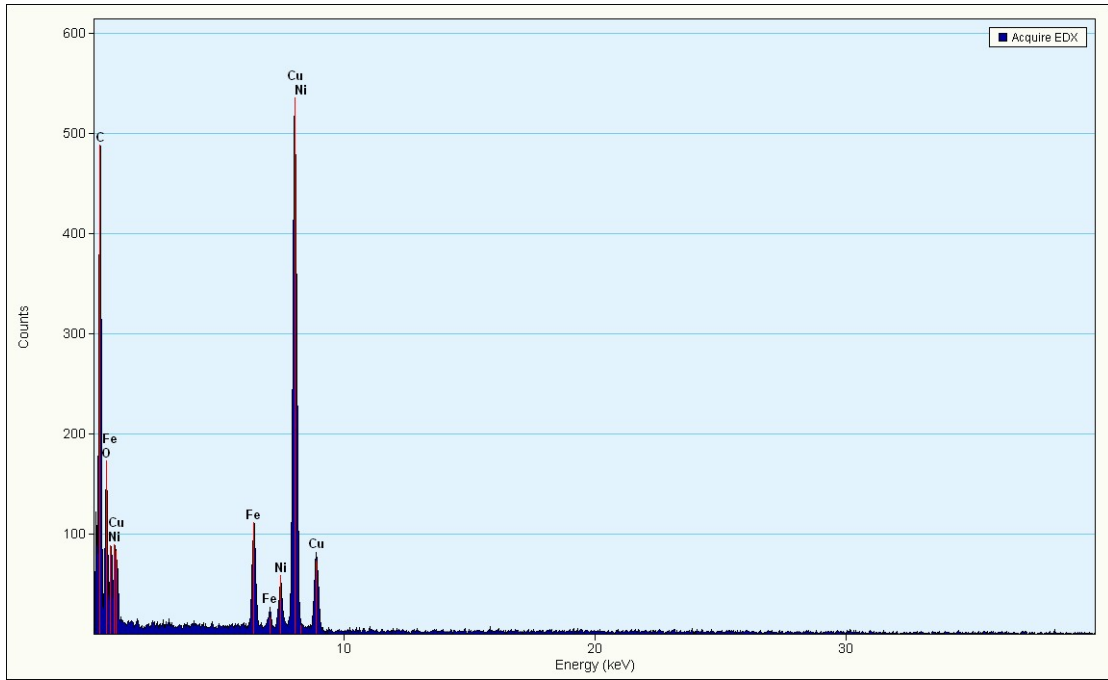

Fig. S4. EDX spectrum of Fe<sub>2</sub>O<sub>3</sub>@NiO.

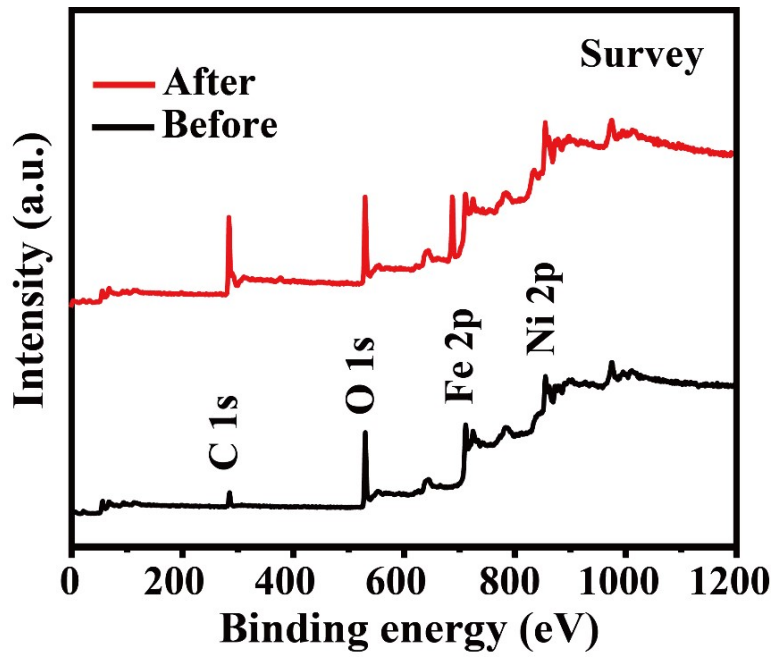

Fig. S5. Elements XPS survey.

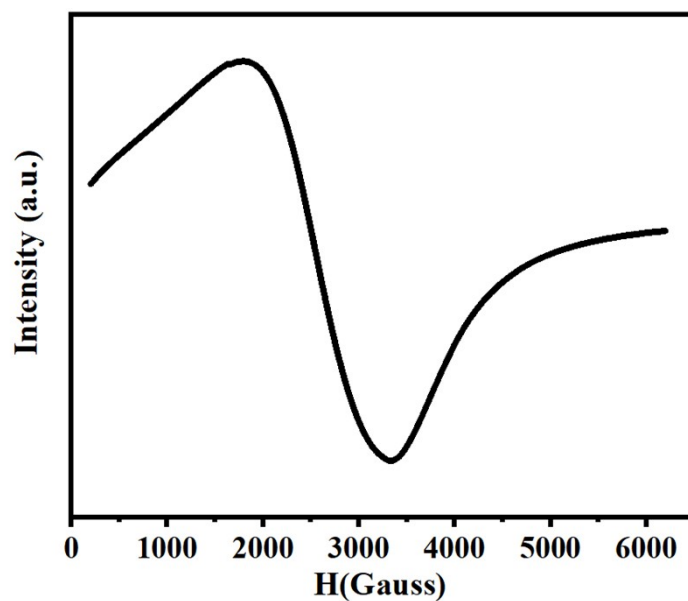

Fig. S6. The collected EPR spectra of  $\text{Fe}_2\text{O}_3@\text{NiO}$  heterojunction.

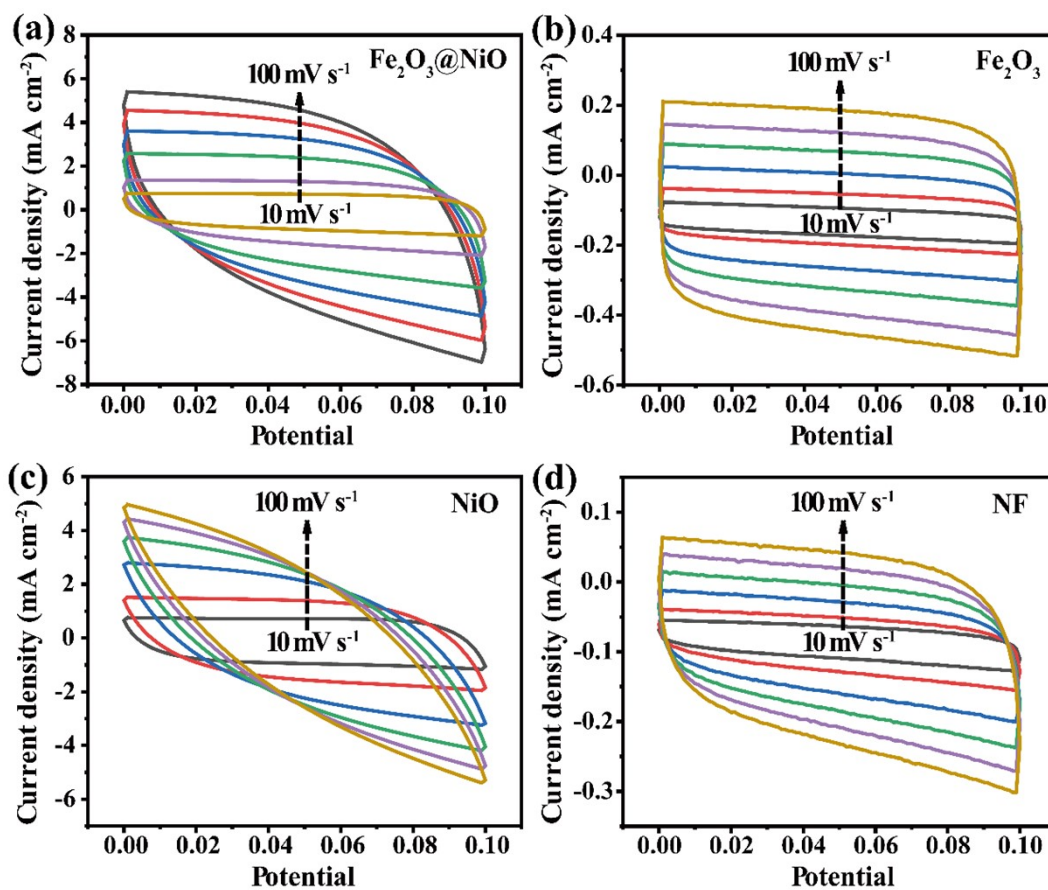

Fig. S7. CV curves for OER in 1 M KOH at the scan rate of 10, 20, 40, 60, 80 and 100  $\text{mV/s}$ : (a)  $\text{Fe}_2\text{O}_3@\text{NiO}$ , (b)  $\text{Fe}_2\text{O}_3$ , (c) NiO, and (d) NF.

**Table S1** Quantitative analysis of EDX elements.

| Element | Weight % | Atomic % | Uncert. % | Detector Correction | k-Factor |
|---------|----------|----------|-----------|---------------------|----------|
| O(K)    | 44.96    | 74.34    | 1.46      | 0.49                | 1.990    |
| Fe(K)   | 37.08    | 17.56    | 0.96      | 0.99                | 1.382    |
| Ni(K)   | 17.94    | 8.08     | 0.74      | 0.99                | 1.484    |

**Table S2** Comparison of the overpotential of Fe<sub>2</sub>O<sub>3</sub>@NiO in 1.0 M KOH with other iron- and nickel-based bifunctional catalysts.

| Catalysts                                 | Electrolyte | j=10mA cm <sup>-2</sup> (mV) |     | Tafel (mV dec <sup>-1</sup> ) |      | Overall Water Splitting (V) | Ref.      |
|-------------------------------------------|-------------|------------------------------|-----|-------------------------------|------|-----------------------------|-----------|
|                                           |             | OER                          | HER | OER                           | HER  |                             |           |
| Fe <sub>2</sub> O <sub>3</sub> @NiO       | 1.0 M KOH   | 224                          | 187 | 20.0                          | 53.8 | 1.63                        | This Work |
| Ni <sub>0.9</sub> Fe <sub>0.1</sub> /NC   | 1.0 M KOH   | 330                          | 231 | 45                            | 111  | 1.58                        | 1         |
| CoFe LDH-F                                | 1.0 M KOH   | 300                          | 255 | 40                            | 95   | 1.63                        | 2         |
| NiFe/NiCo <sub>2</sub> O <sub>4</sub> /NF | 1.0 M KOH   | 260                          | 110 | 38.8                          | 88   | 1.67                        | 3         |
| NiCo <sub>2</sub> S <sub>4</sub> NW       | 1.0 M KOH   | 260                          | 210 | 40.1                          | 58.9 | 1.63                        | 4         |
| Co-Fe oxyphosphide                        | 1.0 M KOH   | 280                          | 180 | 53                            | 62   | 1.69                        | 5         |
| NiFe HNSs                                 | 1.0 M KOH   | 220                          | 189 | 40.7                          | 87.2 | 1.67                        | 6         |
| NiCoFe ALDHs/CFC                          | 1.0 M KOH   | 239                          | 200 | 32                            | 70   | 1.55                        | 7         |

|                     |           |     |     |    |    |      |   |
|---------------------|-----------|-----|-----|----|----|------|---|
| CoFe LDH nanosheets | 1.0 M KOH | 260 | 166 | 40 | 95 | 1.63 | 8 |
| Fe/Co–N–C           | 1.0 M KOH | 340 | 270 | 61 | 83 | \    | 9 |

**Table S3** The ratio of Fe and O before and after test in XPS.

| Before and after test | Fe 2p                |                      |                                           | O 1s   |        |
|-----------------------|----------------------|----------------------|-------------------------------------------|--------|--------|
|                       | Fe <sup>2+</sup> (%) | Fe <sup>3+</sup> (%) | Fe <sup>2+</sup> (%)/Fe <sup>3+</sup> (%) | O1 (%) | O2 (%) |
| Before test           | 37.2                 | 62.8                 | 59.3                                      | 41.9   | 58.1   |
| After test            | 30.8                 | 69.2                 | 44.5                                      | 64.1   | 35.9   |

### References

- [1] X. Zhang, H. Xu, X. Li, Y. Li, T. Yang and Y. Liang, *ACS Catal.*, 2016, **6**, 580–588.
- [2] P. F. Liu, S. Yang, B. Zhang and H. G. Yang, *ACS Appl. Mater. Interfaces*, 2016, **8**, 34474–34481,
- [3] C. Xiao, Y. Li, X. Lu and C. Zhao, *Adv. Funct. Mater.*, 2016, **26**, 3515–3523.
- [4] A. Sivanantham, P. Ganesan and S. Shanmugam, *Adv. Funct. Mater.*, 2016, **26**, 4661–4672.
- [5] P. Zhang, X. F. Lu, J. Nai, S. Q. Zang and X. W. Lou, *Adv. Sci.*, 2019, **6**, 1900576.
- [6] X. Sun, Q. Shao, Y. Pi, J. Guo and X. Huang, *J. Mater. Chem. A*, 2017, **5**, 7769.
- [7] A. L. Wang, H. Xu and G. R. Li, *ACS Energy Lett.*, 2016, **1**, 445-453.
- [8] P. F. Liu, S Yang., B. Zhang and H. G. Yang, *ACS Appl. Mater. Interfaces*, 2016, **8**, 34474-34481.
- [9] J. Yang, X. Wang, B. Li, L. Ma, L. Shi, Y. Xiong and H. Xu, *Adv. Funct. Mater.*, 2017, **27**, 1606497.
